# Supplementary material
Source: publisher figshare collection journal article supplement (https://geolsoc.figshare.com/ndownloader/files/28675289)
Supplement: Supplementary file 1 [file 28675289]

## Sheet: Kostomuksha
Major (wt.%) and trace element (ppm) data of lamproite rocks from Kostomuksha pipe (Karelia, Russia) after Kargin et al., 2011.
Location		Kostomuksha pipe (Kargin et al.,2014)
Oxide/element			Cpx–Phl–Ol type								Phl–Ol type				Phl–Ol type				Phl–Carb type
SiO2	41.12			41.44		42.01	40.87	40.71		40.89			42.42	45.26		35.47		34.85		36.57		39.6		39.47	36.23		41.76
TiO2	2.04			0.71		1.42	2.07	3.26		2.26			2.79	3.66		1.83		2.45		3.56		4.04		3.55	3.66		3.69
Al2O3	3.26			8.58		4.95	4.17	4.61		4.18			4.7	6.13		3.06		4.77		6.46		5.98		5.82	5.9		6.4
FeOtot	7.4			7.03		7.34	6.88	7.76		7.18			6.35	8.37		6.79		7.31		10.33		8.72		8.97	9.37		8.27
MnO	0.15			0.17		0.12	0.12	0.26		0.3			0.13	0.11		0.21		0.14		0.15		0.17		0.17	0.17		0.14
MgO	22.48			25.63		23.46	23.61	22.88		22.75			21.78	13.91		19.11		16.85		17.47		14.75		14.64	15.41		14.52
CaO	9.58			2.12		6.06	8.66	6.7		5.51			6.36	7.81		14.35		15.18		8.69		9.59		10.85	10.69		8.32
Na2O	0.06			0.09		0.04	0.07	0.12		0.07			0.1	0.3		0.08		0.1		0.02		0.04		0.17	0.09		0.05
K2O	2.34			3.79		3.22	2.71	3.5		2			2.19	7.74		2.73		3.78		0.92		3.55		3.68	3.03		4.06
P2O5	0.14			0.16		0.29	0.29	0.41		0.69			0.86	2.09		0.25		1.28		2.12		1		2.74	2.42		0.58
H2O	5.04			7.05		4.49	5.66	5.96		6.6			6.14	2.16		4.75		3.38		10.37		5.48		6.06	7.82		5.92
CO2	4.92			1.39		3.72	3.38	2.55		2.19			2.09	1.33		9.26		7.47		1.98		5.88		1.77	5.13		4.86
F	-	-	-	-
Total	99.27			99.18		99.19	99.29	99.16		98.93			99.07	98.94		99.05		99.18		100.86		99.64		98.9	100.55		99.65
B	1.1			1		1.8	1.9	1.8		3			3.9	4.8		3		2.3		7.6		5.8		3.7	5.4		6.4
Sc	18			9		9.6	35	25		14			17	18		14		31		15		10.5		24	25		28
V	30			38		85	79	56		78			91	57		82		55		127		81		116	110		91
Cr	1063			1864		1452	954	1109		1454			1019	306		973		786		475		421		335	361		451
Co	47			50		45	36	47		63			50	27		38		33		48		43		36	17		27
Ni	1021			1072		893	851	973		1409			942	265		804		580		417		393		290	224		215
Cu	7			12		23	24	19		28			25	17		72		24		42		44		43	31		23
Zn	47			53		55	41	45		58			59	71		46		45		88		88		90	77		63
Ga	11			7.6		7	6.6	11		11			11	17		9.3		11		28		154		146	9.2		10
Rb	120			234		192	140	166		80			88	200		136		163		27		117		109	79		105
Sr	349			245		482	687	613		1096			670	1569		516		736		1815		968		1713	1493		572
Y	9			8		10	13	15		7			15	23		14		20		22		18		25	25		17
Zr	183			122		185	225	226		252			627	639		276		386		741		736		775	1012		1003
Nb	68			48		104	144	175		63			108	119		167		138		159		227		124	133		136
Cs	2.9			6.3		3.9	2	3.6		1.6			0.73	3.6		2.1		2.6		0.3		1.1		0.5	0.6		1.6
Ba	1421			1212		1541	949	1582		1217			1516	3250		2562		2039		982		6146		6323	1636		5361
La	121			92		117	181	445		185			220	327		290		282		350		375		309	286		322
Ce	207			155		200	345	881		363			471	597		502		533		739		745		659	588		609
Pr	18			13		18	37	95		42			57	67		52		57		84		81		78	65		68
Nd	59			43		59	110	302		134			185	220		156		176		277		264		275	239		223
Sm	5.6			4.2		5.7	10.8	25.8		14.2			21.1	22.2		16.3		18.1		32		26.6		35.4	28.2		24
Eu	0.9			0.6		1	1.9	4		2.1			3.6	3.8		2.8		3.3		5.9		7.3		9.9	6.5		4.8
Gd	3.3			2.5		3.3	5.5	12.7		7.3			11.5	13.5		8.7		10.2		11.4		10.9		15.9	12.8		10.5
Tb	0.37			0.3		0.41	0.6	1.41		0.82			1.33	1.58		0.96		1.17		1.74		1.54		2.05	1.3		1.02
Dy	1.1			0.96		1.36	1.7	3.63		2.52			4.46	5.64		3.21		3.99		6.76		4.91		7.54	5.65		4.07
Ho	0.17			0.15		0.22	0.25	0.44		0.33			0.64	0.83		0.49		0.61		1.06		0.78		1.15	0.83		0.54
Er	0.39			0.32		0.53	0.51	0.87		0.87			1.49	1.89		1.27		1.49		2.91		2.35		2.98	1.85		1.21
Tm	0.05			0.04		0.07	0.05	0.09		0.08			0.15	0.19		0.13		0.15		0.33		0.26		0.34	0.2		0.16
Yb	0.3			0.22		0.36	0.31	0.5		0.49			0.97	1.09		0.87		0.88		2.06		1.73		2.07	1.16		1
Lu	0.05			0.03		0.04	0.04	0.07		0.06			0.14	0.14		0.12		0.13		0.26		0.21		0.25	0.16		0.15
Hf	7.9			3.4		4.9	5.3	5.7		5.8			12.1	10.6		9.1		11.4		21.5		21.4		26.3	25		23.9
Ta	6.1			3.2		5	8.2	24.7		0.5			0.7	0.2		12.2		8.1		8.6		9.4		8.4	10.4		9.3
Pb	6.1			6.8		8.6	9.4	9.8		20.9			31.4	30.8		26.9		17.4		44		48		49	49		36.9
Th	9.2			5.4		6.8	11.5	52.9		5.8			19.9	22.1		16.5		29.7		32.7		28.2		27.4	29.3		23
U	1.2			1.1		1.5	1.5	2.3		1.2			3	2.4		3.2		3.2		7.1		4		4.7	5.9		3.1
ƩREE	417			312		407	695	1773		753			978	1262		1035		1088		1514		1522		1399	1237		1269

## Sheet: Smoky Butte
Major (wt.%) and trace element (ppm) data of lamproite rocks from pipes Argail (West Australia) and Smoky Butte (Montana, USA) after Mitchell, Platt, 1987
Location	Smoky Butte
SiO2	50.17	51.44	51.38	49.8
TiO2	6.49	5.62	5.27	2.8
Al2O3	11.63	8.08	8.86	8.5
FeOtot	4.41	5.2	5.05	6.5
MnO	0.05	0.06	0.07	0.1
MgO	3.86	9.39	8.37	11.7
CaO	3.77	4.8	4.73	5.8
Na2O	0.34	2.92	1.34	1.3
K2O	11.36	1.36	6.48	6.6
P2O5	2.87	2.58	2.26	1.2
H2O	-	-	-	-
CO2	-	-	-	2.7
F	-	-	-	-
Total	-	-	-	-
Sc	14.4	13.5	14.9	15.3
V	-	-	-	-
Cr	460	449	557	583
Co	26.4	34.2	25.1	19.5
Ni	-	-	-
Cu	-	-	-	-
Zn	-	-	-	-
Ga	-	-	-	-
Rb	-	-	-	-
Sr	-	-	-	-
Y	-	-	-	-
Zr	-	-	-	-
Nb	-	-	-	-
Cs	-	-	-	-
Ba	-	-	-	-
La	363	338	408	365
Ce	813	697	902	980
Pr	-	-	-	-
Nd	-	-	-	-
Sm	33.7	30.8	35.9	35.7
Eu	7.9	6.98	9.07	10.23
Gd
Tb	2	1.73	1.95	2.69
Dy	-	-	-	-
Ho	-	-	-	-
Er	-	-	-	-
Yb	1.69	1.68	1.73	1.69
Lu	-	-	-	-
Hf	45.9	42.8	52.5	52.5
Ta	5.22	4.87	6.36	7.18
Pb	-	-	-	-
Th	5.75	4.96	6.58	6.81
U	-	-	-	-
ƩREE	1221.29	1076.19	1358.65	1395.31

## Sheet:  Ellendale 2
Major (wt.%) and trace element (ppm) data of Ellendale 2 pipes (Western Australia) after Jaques et al.,1986
Location	Ellendale 2
SiO2	42.5	37.1	37.4	39.6
TiO2	4.63	4.6	4.79	4.59
Al2O3	4.3	4.4	4.7	4.2
FeO tot	7.74	8.71	8.65	7.74
MnO	0.13	0.14	0.14	0.16
MgO	17.7	15.8	16.3	17.7
CaO	4.6	7.25	6.21	5.65
Na2O	0.88	0.63	0.86	0.96
K2O	4.34	3.35	3.47	4.11
P2O5	1.44	2.1	1.87	1.21
H2O	5.65	4.89	5.16	5.71
CO2	0.28	2.56	1.68	1.41
S	0.03	0.026	0.016	0.049
F	0.6	0.49	0.55	0.466
Total
Sc 45	27	29	32	25
V	56	50	56	30
Cr	952	695	633	698
Co	58	51	51	61
Ni	600	627	632	706
Cu	56	53	60	53
Zn	96	81	75	80
Rb	538	362	358	471
Sr	1613	1975	1874	1659
Y	29	26	24	21
Zr	1371	1648	1618	1550
Nb	259	207	211	229
Ba	4906	5306	6239	7676
La	511	623	616	618
Ce	669	1186	1137	1131

## Sheet: Variscan Bohemian Massif
Major (wt.%) and trace element (ppm) data of Variscan Bohemian Massif (Austria, the Czech Republic, Poland) after Krmiček et al., 2016
No.	1	2	3	4	5	6	7	8	9	10	11	12	13A	13B
Sample	PK102	PK101	PK103	LK11	PK106	LK13	PK98	PK99	PK12	R1	PK13	PK100	PK14	PK17
SiO2 (wt.%)	61.6	62.1	59.4	59.1	53.8	57.4	60.3	56.2	60.2	59.6	60.7	67.9	62.9	62.1
TiO2	2.43	2	0.91	1.12	2.23	1.78	0.78	1.81	0.55	0.55	0.94	0.84	1.47	1.36
Al2O3	10.3	8.91	12.5	14.1	7.91	10	11.8	10.6	11.7	11.4	11.8	11.8	12.3	12.1
Fe2O3tot	6.36	4.59	4.19	3.96	5.76	5.57	4.46	5.12	4.61	4.15	4.31	2.9	3.13	4.01
MnO	0.07	0.06	0.08	0.06	0.1	0.12	0.08	0.08	0.14	0.1	0.08	0.04	0.06	0.07
MgO	2.26	5.46	4.69	2.81	7.32	5.9	5.27	5.92	5.16	7.27	4.35	1.59	3.07	3.42
CaO	2.23	1.96	4.66	4.74	5.53	4.36	3.72	4.09	3.87	3.6	2.22	0.89	2.48	2.75
Na2O	1.2	1.71	2.57	2.13	2.1	1.42	3.07	1.22	2.13	2.21	1.48	1.14	0.99	1.96
K2O	10	10.1	7.56	8.98	9.53	9.5	7.2	10.4	8.29	7.73	10.6	10.7	11.1	9.48
P2O5	1.29	0.98	1.39	1.3	2.55	1.96	1.13	2.08	1.01	0.86	1.14	0.62	0.61	0.6
LOI	1.2	1.5	0.7	1.25	1.6	1.21	1.1	1.3	1.2	2.81	1.1	0.8	0.8	0.8
Total	98.9	99.4	98.7	99.6	98.4	99.2	98.9	98.8	98.9	100.3	98.7	99.2	98.9	98.7
Sr (ppm)	1400	917	2420	2480	2380	1360	1180	1490	1030	1230	1040	490	1460	1410
Rb	447	370	185	139	235	294	267	394	271	173	358	373	327	309
Ba	2720	1130	6590	5050	5890	5300	5050	3530	4730	3620	4540	2070	3550	5600
Cs	4.5	1.8	1.5	1.6	2.1	3.7	3.8	5.5	3.1	4.8	8	17.2	5.4	3.5
Th	274	155	52.3	30.4	83.6	76.7	73.8	99.8	62.1	56.3	236	230	48.2	127
U	26.6	25.7	11	5.1	13	9.7	10.7	21.4	21.8	8.5	29	24.4	10.9	24.9
Ta	3.4	3	1.3	1	2.8	1.6	3.3	2	2.5	2	9	7.3	7.1	6.5
Nb	52.2	69.8	19.6	15.1	58.5	34.1	49.3	38.8	38.1	26.9	132	108	110	106
Zr	2070	1420	512	531	1450	854	350	1000	272	220	1700	1640	1700	1601
Hf	61	44.3	15.8	15	44.2	24.7	11.7	30.6	7.1	6.3	49.2	52.3	51.3	46.2
Y	35.9	34.9	31	23.4	45.9	25.5	26.8	30.7	23.4	24.6	29.2	26.2	19.7	32.9
Pb	56.9	41	35.2	22.5	47.7	68.8	100	111	18.5	267	61	72.3	53.1	150
Co	11.9	18	15.5	7.4	23.1	22.3	15.1	19.6	17.4	16.1	15.7	5.4	10.3	12.2
Ni	7.3	23.8	13	17.8	40	96.1	31.8	127.1	13	81.5	42.3	9.7	5.7	24.1
Cr	88.9	191	177	102	294	157	301	219	266	492	212	47.9	109	150
V	140	81	75	53	106	81	73	97	71	44	76	23	81	78
Zn	11	12	15	27	17	28	36	23	18	159	25	14	3	19
Cu	2.9	2.1	2.5	7.7	5.2	11.8	31	12.2	1.7	11.4	1.7	1.7	1.1	5.4
La	93.2	104	231	250	222	126	100	135	81.5	81.4	169	101	197	228
Ce	223	271	487	496	478	259	214	302	170	165	391	215	432	475
Pr	29.4	37	54.4	56.8	54.9	32.1	25.2	37.2	19.5	19.2	42.1	23.9	45.6	48
Nd	121	155	204	209	208	127	95.5	147	74.7	73.1	158	83.7	160	167
Sm	20.1	23.7	26.6	27.2	31.8	21.3	15.7	23.4	10.7	12.4	23.6	13.4	19.5	20.8
Eu	4	4.5	6.3	6.4	7.1	5.1	3.1	5.2	2.8	2.8	3.3	2	3.3	3.5
Gd	11.5	12.1	12.8	15.6	18.3	13.1	8.6	13.3	6.6	8.6	12.9	7.7	9.4	11.4
Tb	1.47	1.54	1.49	1.61	2.18	1.57	1.16	1.61	0.93	1.1	1.49	1.06	1.08	1.42
Dy	6.7	7.1	6	6.5	9.5	6.7	5.3	7.2	4.8	5.2	6.4	5.1	4.6	6.7
Ho	1.14	1.13	0.91	0.89	1.42	0.97	0.85	1.01	0.8	0.93	0.89	0.84	0.65	1.09
Er	2.9	3.1	2.4	2.2	3.7	2.6	2.4	2.4	2.1	2.6	2.2	2.2	1.6	2.5
Tm	0.45	0.47	0.34	0.28	0.54	0.34	0.33	0.34	0.28	0.38	0.32	0.32	0.24	0.4
Yb	3	3	2.2	1.6	3.3	2.2	2.3	2.2	2	2.3	2.1	2	1.3	2.5
Lu	0.46	0.42	0.33	0.24	0.47	0.28	0.33	0.3	0.32	0.34	0.29	0.29	0.22	0.35
(Na + K)/Al	1.24	1.54	1	0.94	1.74	1.26	1.09	1.25	1.07	1.05	1.17	1.14	1.11	1.11
100 Mg/(Mg + Fetot)	41	70	69	58	72	68	70	70	69	78	67	52	66	63
La/Nb	1.8	1.5	11.8	16.6	3.8	3.7	2
(Na + K)/Al	1.24	1.54	1	0.94	1.74	1.26	1.09
100 Mg/(Mg + Fetot)	41	70	69	58	72	68	70
